# Supplementary material for: Dichotomy in the NRT Gene Families of Dicots and Grass Species
Source: PLoS One. 2010 Dec 6;5(12):e15289. doi: 10.1371/journal.pone.0015289 (PMC2997785; doi:10.1371/journal.pone.0015289)
Supplement: Table S1 — Identifiers, annotations and family similarities for the Arabidopsis NRT genes described in this study. Provided are the TAIR annotation and identifier, UniprotKB identifier and RefSeq identifier for each NRT gene. Amino acid length of each protein is provided as well as the amino acid identity (%) between the NRTx.1 protein and the other family members. (XLS) [file pone.0015289.s008.xls]

## Sheet: TableS1
Table S1: Identifiers, annotations and family similarities for the Arabidopsis NRT genes described in this study.
Protein	TAIR	Accession no.			Amino	Identity
Symbol	Annotation	TAIR	UniProtKB	RefSeq	acids	%
NRT1 Family - Arabidopsis Dual/Low Affinity Nitrate Transporters
AtNRT1.1	nitrate transmembrane transporter chr1:4105233-4109545 FORWARD	At1g12110	Q05085	NP_563899	590	100
AtNRT1.2	calcium ion binding chr1:26296676-26300472 REVERSE	At1g69850	Q8H157	NP_564978	585	34
AtNRT1.3	nitrate transporter (NTP3) chr3:7626757-7629151 REVERSE	At3g21670	Q9LVE0	NP_188804	590	47
AtNRT1.4	nitrate transporter (NTP2) chr2:11347147-11350993 REVERSE	At2g26690	Q9SZY4	NP_850084	577	52
AtNRT1.5	nitrate transmembrane transporter chr1:11715150-11719970 REVERSE	At1g32450	Q9LQL2	NP_174523	614	33
AtNRT1.6	low affinity nitrate transmembrane transporter chr1:9400664-9403789 FORWARD	At1g27080	A9QUN3	NP_174028	576	28
AtNRT1.7	proton-dependent oligopeptide transport (POT) family protein chr1:26316027-26320220 FORWARD	At1g69870	Q8RX77	NP_564979	620	31
AtNRT1.8	proton-dependent oligopeptide transport (POT) family protein chr4:11517540-11519576 REVERSE	At4g21680	Q8GXN2	NP_193899	589	35
NRT2 Family - Arabidopsis High Affinity Nitrate Transporters
AtNRT2.1	nitrate transmembrane transporter chr1:2524076-2526164 FORWARD	At1g08090	O82811	NP_172288	530	100
AtNRT2.2	nitrate transmembrane transporter chr1:2527170-2529120 REVERSE	At1g08100	Q9LMZ9	NP_172289	522	87
AtNRT2.3	nitrate transmembrane transporter chr5:24450839-24452756 FORWARD	At5g60780	Q9FJH7	NP_200886	539	68
AtNRT2.4	nitrate transmembrane transporter chr5:24444396-24447026 FORWARD	At5g60770	Q9FJH8	NP_200885	527	82
AtNRT2.5	nitrate transmembrane transporter chr1:4416405-4418590 FORWARD	At1g12940	Q9LPV5	NP_172754	502	56
AtNRT2.6	nitrate transmembrane transporter chr3:16477561-16479482 REVERSE	At3g45060	Q9LXH0	NP_190092	542	68
AtNRT2.7	nitrate transmembrane transporter chr5:4695084-4697078 REVERSE	At5g14570	Q9LYK2	NP_196961	493	44
NRT3 Family - Arabidopsis Component Transporters
AtNRT3.1	WR3 (WOUND-RESPONSIVE 3); nitrate transmembrane transporter chr5:20436180-20437726 FORWARD	At5g50200	Q9FGS5	NP_199831	210	100
AtNRT3.2	calcineurin-like phosphoesterase family protein chr4:12749761-12754096 REVERSE	At4g24730	Q9SB68	NP_001119045	443	51
AtNRT3.2CT*	DQ492237* Arabidopsis thaliana clone 0000020341_0000014174 hypothetical proteinmRNA, complete cds	At4g24720!	N/A	N/A	209	61
* Genbank Entry
! Obsolete TAIR entry
Provided are the TAIR annotation and identifier, UniprotKB identifier and RefSeq identifier for each NRT gene. Amino acid length of each protein is provided as well as the amino acid identity (%) between the NRTx.1 protein and the other family members.
