# Supplementary material for: Dichotomy in the NRT Gene Families of Dicots and Grass Species
Source: PLoS One. 2010 Dec 6;5(12):e15289. doi: 10.1371/journal.pone.0015289 (PMC2997785; doi:10.1371/journal.pone.0015289)
Supplement: Table S4 — List of candidate homologues excluded from analysis after manual inspection of multiple sequence alignments and their corresponding trees. (XLS) [file pone.0015289.s011.xls]

## Sheet: TableS4
Table S4: List of candidate homologues excluded from analysis after manual inspection of multiple sequence alignments and their corresponding trees.
Accession #	Arabidopsis Homolog
GRMZM2G085411	AtNRT1.5/1.8
GRMZM2G104542	AtNRT1.5/1.8
GRMZM2G122251	AtNRT1.5/1.8
Sb08g022290	AtNRT1.5/1.8
Sb08g023060	AtNRT1.5/1.8
Sb01g011700	AtNRT1.5/1.8
Bradi1g12190	AtNRT1.5/1.8
LOC_Os03g48180	AtNRT1.5/1.8
GRMZM2G337128	AtNRT3.2SF2/3
Sb07g024380.1	AtNRT3.2SF2/3
